# Supplementary material for: Dynamic changes of optical and chemical properties of tar ball aerosols by atmospheric photochemical aging
Source: Copernicus journal article supplement (doi:10.5194/acp-2018-882), 2018-09-03
Supplement: Supplementary file [file acp-2018-882-AC2-supplement.pdf]

1 **Anonymous Referee #2:** This manuscript describes the systematic study of how the chemical  
2 and optical properties of laboratory-generated tar ball aerosols change upon reaction with OH,  
3 exposure to 254 nm light and oxidation in the presence of NO<sub>x</sub>. What is really interesting  
4 about this study is that the authors extracted the polar (water-soluble) and non-polar fractions  
5 and found significant differences in both chemical composition and the responses to oxidation.  
6 The formation of organic-nitrates was found to increase absorption, which at least partially  
7 offsets the decrease in absorption (“bleaching”) observed upon photolysis and oxidation by  
8 OH radicals. By using a range of EADs (Equivalent daytime Atmospheric oxidation Days) of  
9 ~0.5-7 days, the authors explore atmospherically relevant extents of oxidation. The use and  
10 description of a controlled method for obtaining reproducible tar ball extract samples in the  
11 laboratory is also important. This procedure allows the authors to make systematic studies of  
12 semi-authentic aerosol samples that appear to be consistent with ambient tar ball samples.  
13 Overall, this manuscript is well written, and the data are interpreted carefully. Given the  
14 growing evidence of the importance of tar balls in atmospheric aerosols and the open  
15 questions about brown carbon’s molecular composition, this manuscript is an important  
16 contribution in this area and is appropriate for ACPD.

17 Specific comments:

18 1. Since the photolysis was carried out at only one wavelength, 254 nm, statements about  
19 increases in absorption from the formation of organic-nitrates offsetting bleaching from  
20 photolysis should be highly qualified.

21 **Authors’ reply:** We thanks the Reviewer for the thoughtful comments. Tar ball particles  
22 underwent photochemical aging in the OFR. This included NO<sub>x</sub>-dependent OH  
23 photooxidation and photolysis at 254 nm. We suggest that NO<sub>x</sub>-dependent OH radical aging  
24 should be the dominant photochemical pathway that bleach, darken and oxidize tar balls  
25 (Sumlin et al., 2017). The role of photolysis in tar ball chemical and optical changes were  
26 investigated, and the results are discussed in detail in the Supporting Information Part 12  
27 **(Optical and chemical changes for tar ball aerosols due to photolysis from UV light  
28 irradiation in the OFR)**. Specifically, we exposed the tar balls to the same aging condition  
29 without O<sub>3</sub> and NO<sub>x</sub> addition, where the actual UV flux is higher without O<sub>3</sub>, RO<sub>2</sub>/HO<sub>2</sub>  
30 radicals and NO<sub>x</sub> that absorb some of the photons. However, no significant chemical and RI  
31 changes were observed in the tar balls even under maximum UV flux in the OFR. On the  
32 experimental time scale (residence time ~144s in the OFR), the small observed changes  
33 during photolysis can be neglected compared to the extensive bleaching and oxidation  
34 observed under the same conditions in presence of OH radical. We have clarified these points  
35 in the paper ([Page 18, Line 496-504](#)).

36 It was also found that addition of NO<sub>x</sub> restored absorption and counteracted the OH  
37 photochemical bleaching of the tar balls to facilitate absorption under high NO<sub>x</sub> concentration.  
38 We suggest that the formation of organic nitrates offsets the bleaching from photolysis and  
39 from OH photooxidation to eventually enhance light absorption of the tar balls. It is correct  
40 that 254nm UV photolysis in the OFR does not represent the solar irradiation in the  
41 atmosphere, it is arbitrary to state that increases in absorption from the formation of  
42 organic-nitrates offset bleaching from photolysis. We corrected this statement ([Page 2, Line  
43 35-36](#)), and we will quantify the photolysis and OH radical oxidation effect in a following

44 study, and study the chemical process of some related organic-nitrates during their lifetime in  
45 the atmosphere.

46 Page 2, Line 35-36 in manuscript: “These observations suggest that secondary organic nitrate  
47 formation counteracts the bleaching by OH radical photooxidation to eventually regain some  
48 absorption of the tar balls aerosols.”

49 2. Equation 4: How is the mass concentration of the solution, C, determined in calculating the  
50 MAC (mass absorption cross section)?

51 **Authors’ reply:** The mass concentration of BrC extracted in methanol solution was calculated  
52 to be in the range of 0.01~0.02 g L<sup>-1</sup>. The BrC concentration was calculated from filter mass  
53 loading of tar ball aerosol (100~150 µg), methanol volume (7.5 mL) assuming hundred  
54 percent extraction efficiency, and OM/OC ratio from AMS measurement. The mass loading  
55 for each filter sample was estimated from the aerosol volume distribution measured by SMPS,  
56 particle density measured from AAC-SMPS (~1.24-1.33 g cm<sup>-3</sup>), and the total sampling  
57 volume. The BrC mass concentration can be calculated by the function shown below:

$$C_{BrC} = \frac{V_{tar} \times \rho_{eff} \times t \times v}{V_{methanol}} \times r$$

58 Where  $V_{tar}$  is the tar ball aerosol volume concentration measured by SMPS between 14 and  
59 670 nm,  $\rho_{eff}$  is effective density calculated from aerodynamic and electric-mobility  
60 distribution for fixed monodispersed tar ball,  $t$  is the filter sampling time,  $v$  is filter sampling  
61 flow,  $V_{methanol}$  is the total volume of solvent used to extract the filter sample,  $r$  is organic  
62 carbon (OC) fraction in tar ball aerosol, which can be derived from AMS measurement of  
63 OC/OM with the assumption that the EC content can be neglected in tar ball aerosol (as  
64 discussed above).

65 We added this information in the methods part of the manuscript:

66 Page10 Line 270 in manuscript: “C is the extracted organic carbon mass concentration in  
67 solvent (g m<sup>-3</sup>), which can be determined directly by normalizing the extract concentration  
68 and OC mass fraction for tar balls as OC/OM obtained from AMS data, as no other refractory  
69 elemental carbon (EC) content was detected in our samples (details see in SI).”

70

71 3. Line 597: “EAD” should be “EDA”.

72 **Authors’ reply:** Thanks. “EAD” has been corrected in Page 22, Lin 620.

73

74 4. What fraction of the mass and/or the absorption is attributable to the polar vs. the non-polar  
75 fractions?

76 **Authors’ reply:** In this study, light absorbing properties of polar and nonpolar chemical  
77 matrix from wood pyrolysis were characterized. We found that the refractive index for the  
78 mixture of polar and nonpolar organic fractions fit both volume and molar mixing rules (see  
79 supporting information of prediction of mixture tar ball optical properties based on different  
80 mixing rules). However, the actual fractions of the polar and nonpolar compounds

81 contributing to the mass/absorption of ambient tar ball or BBOA are still under study, as they  
82 vary with biofuel, burning conditions, atmospheric processes, and also the method/efficiency  
83 used to classify the polar and nonpolar materials from the sample (Sengupta., et al., 2018; Lin  
84 et al., 2017; Chen and Bond, et al., 2010; Sumlin et al., 2017) (Page 6, Line 133-137).  
85 According to most previous studies, the nonpolar or less polar fractions have higher  
86 absorption properties compared with the polar fraction from BBOA. Sengupta et al. (2018)  
87 reported that the fuel mass normalized nonpolar fraction is 2-3 times more absorbing than the  
88 polar fraction, and complex fuel-dependence and atmospheric aging dependence were  
89 observed for absorption changes of both fractions. Lin et al. (2017) and Bluvshstein et al.  
90 (2017) tracked the absorption changes of BBOA with respect to different solvent extraction  
91 during a whole fire episode, and found distinct different absorbing features for the  
92 water-extracted fraction compared to the organic solvent extracts, while acetonitrile and  
93 orgmix (acetonitrile: dichloromethane: hexane = 2:2:1, v/v) extracts exhibited similar  
94 absorption. According to Lin et al. (2017), from the beginning to the end of the fire event,  
95 organic extracts showed higher light absorption at shorter wavelength ( $\lambda < 380$  nm). In contrast,  
96 higher light absorption with an absorption feature around 450 nm (attributed to nitro-phenols)  
97 hump was observed for water extracts.

98 Rajput et al. (2014) classified the mass fractions of polar and nonpolar organic matter from  
99 agricultural-waste burning emissions. Nearly 85 wt.% of the burning organic emissions was  
100 attributed to a polar fraction, and this fraction from wheat residue burning was much lower  
101 than from paddy burning. Asa-Awuku et al. (2008) suggested that relative molar proportion of  
102 nonpolar (hydrophobic) to polar (hydrophilic) compounds in original biomass burning aerosol  
103 is 1:3 from Köhler Theory Analysis (Page 6, Line 133-137; Page 17, Line 451-456).

104 In short, the polar fraction dominates the bulk organic aerosol from biomass burning.  
105 However, the real polar fraction in the tar balls is undefined, as tar balls belong to BBOA but  
106 from specific burning condition with special physicochemical properties. The topic raised in  
107 the Reviewer's question will be part of our following research topic to investigate the exact  
108 contribution of both the polar/nonpolar matrix and to identify specific chromophore  
109 molecules to tar ball aerosol absorption/mass. We have sent the samples of the fresh and aged  
110 laboratory-generated polar/nonpolar tar ball for extensive molecular chemical analysis using  
111 HPLC/PDA/HRMS (high performance liquid chromatography platform coupled to  
112 photo-diode array and high resolution mass spectrometry detectors) and other common MS  
113 techniques (e.g., ESI/APPI-MS, electrospray ionization/atmospheric pressure photo ionization  
114 mass spectrometry), the results will be published in a different manuscript.

115 We have added the discussion of polar and nonpolar fractions contribution to tar ball  
116 aerosols mass and absorption in the manuscript:

117 Page 6, Line 133-137: "The actual fractions of the polar and nonpolar compounds  
118 contributing to the mass of ambient tar ball or biomass burning organic aerosol (BBOA) can  
119 vary with biofuel sources, burning condition, atmospheric process, and also method/efficiency  
120 to classify the polar and nonpolar materials from the sample (Sengupta., et al., 2018; Lin et al.,  
121 2017, 2018; Chen and Bond, et al., 2010; Rajput et al., 2008),"

122 Page 17, Line 451-456: "As mentioned above, the real fractions of polar and nonpolar BrC  
123 contributing to the mass/absorption of BBOA are undefined, some investigations report that

124 the polar BrC dominate the tar balls' mass (50~85%), but contribute less to the absorption in  
125 BBOA (less than 40%) (Asa-Awuku et al., 2008; Bluvshstein et al., 2017; Lin et al., 2017,  
126 2018; Rajput et al., 2014; Sengupta et al., 2018). The “linear mixing rule” confirmed in this  
127 study should be helpful in the mathematical modeling to assess the climatic impacts of  
128 biomass burning related BrC aerosol, when their chemical composition is classified.”

129 Reference

130 Asa-Awuku, A., Sullivan, A., Hennigan, C., Weber, R., and Nenes, A.: Investigation of molar  
131 volume and surfactant characteristics of water-soluble organic compounds in biomass burning  
132 aerosol, *Atmos. Chem. Phys.*, 8, 799-812, doi:10.5194/acp-8-799-2008, 2008.

133 Bluvshstein, N.; Lin, P.; Flores, J. M.; Segev, L.; Mazar, Y.; Tas, E.; Snider, G.; Weagle, C.;  
134 Brown, S. S.; Laskin, A., Broadband optical properties of biomass - burning aerosol and  
135 identification of brown carbon chromophores. *J. Geophys. Res. Atmos.*, 122, 5441-5456,  
136 doi:10.1002/2016JD026230, 2017.

137 Chen, Y., and Bond, T.: Light absorption by organic carbon from wood combustion, *Atmos.*  
138 *Chem. Phys.*, 10, 1773-1787, doi:10.5194/acp-10-1773-2010, 2010.

139 Lin, P., Bluvshstein, N., Rudich, Y., Nizkorodov, S. A., Laskin, J., and Laskin, A.: Molecular  
140 Chemistry of Atmospheric Brown Carbon Inferred from a Nationwide Biomass Burning  
141 Event, *Environ. Sci. Technol.*, 51, 11561-11570, doi:10.1021/acs.est.7b02276, 2017.

142 Lin, P.; Fleming, L. T.; Nizkorodov, S. A.; Laskin, J.; Laskin, A., Comprehensive Molecular  
143 Characterization of Atmospheric Brown Carbon by High Resolution Mass Spectrometry with  
144 Electrospray and Atmospheric Pressure Photoionization. *Anal. Chem.*, 90, 12439-12502,  
145 doi:10.1021/acs.analchem.8b02177, 2018.

146 Rajput, P., and Sarin, M.: Polar and non-polar organic aerosols from large-scale  
147 agricultural-waste burning emissions in Northern India: implications to organic  
148 mass-to-organic carbon ratio, *Chemosphere*, 103, 74-79,  
149 doi:10.1016/j.chemosphere.2013.11.028, 2014.

150 Sengupta, D., Samburova, V., Bhattarai, C., Kirillova, E., Mazzoleni, L., Iaukea-Lum, M.,  
151 Watts, A., Moosmüller, H., and Khlystov, A.: Light absorption by polar and non-polar aerosol  
152 compounds from laboratory biomass combustion, *Atmos. Chem. Phys.*, 18, 10849-10867,  
153 doi:10.5194/acp-18-10849-2018, 2018.

154 Sumlin, B. J., Pandey, A., Walker, M. J., Pattison, R. S., Williams, B. J., and Chakrabarty, R.  
155 K.: Atmospheric Photooxidation Diminishes Light Absorption by Primary Brown Carbon  
156 Aerosol from Biomass Burning, *Environ. Sci. Technol. Lett.*, 4, 540-545,  
157 doi:10.1021/acs.estlett.7b00393, 2017.

158
